# Supplementary material for: Gram-scale synthesis of superparamagnetic Fe3O4nanocrystal clusters with long-term charge stability for highly stable magnetically responsive photonic crystals
Source: Royal Society of Chemistry journal article supplement (doi:10.1039/c6nr07155d), 2016-01-01
Supplement: c6nr07155d1.pdf [file c6nr07155d1.pdf]

## Gram-Scale Synthesis of Superparamagnetic Fe<sub>3</sub>O<sub>4</sub> Nanocrystal Clusters with Long-Term Charge Stability for Highly Stable Magnetically Responsive Photonic Crystals

Peipei Yang,<sup>a†</sup> Hai Li,<sup>a†</sup> Shumin Zhang,<sup>a</sup> Lei Chen,<sup>a</sup> Hao Zhou,<sup>b</sup> Rujun Tang,<sup>b</sup> Tian Zhou,<sup>a</sup> Feng Bao,<sup>a</sup> Qiao Zhang,<sup>a\*</sup>, Le He<sup>a\*</sup> and Xiaohong Zhang,<sup>a\*</sup>

<sup>a</sup> Institute of Functional Nano & Soft Materials (FUNSOM), Jiangsu Key Laboratory for Carbon-Based Functional Materials & Devices, Soochow University, 199 Ren'ai Road, Suzhou, 215123, Jiangsu, PR China. Email: qiaozhang@suda.edu.cn; lehe@suda.edu.cn; xiaohong\_zhang@suda.edu.cn

<sup>b</sup> Jiangsu Key Laboratory of Thin Films, School of Physical Science and Technology, Soochow University, Suzhou, 215006, Jiangsu, PR China

<sup>†</sup> These authors contribute equally to this work.

### Supporting Figures

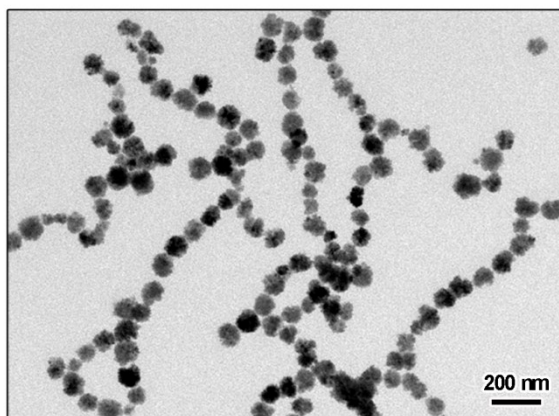

**Figure S1.** The TEM image shows the morphology of Fe<sub>3</sub>O<sub>4</sub> CNCs synthesized by using 16.5 g of sodium acetate while keeping other experimental parameters constant ([FeCl<sub>3</sub>·6H<sub>2</sub>O] = 6 mmol, PAA = 0.69 g, EG = 60 mL, reaction temperature = 200 °C, and time = 10 h).

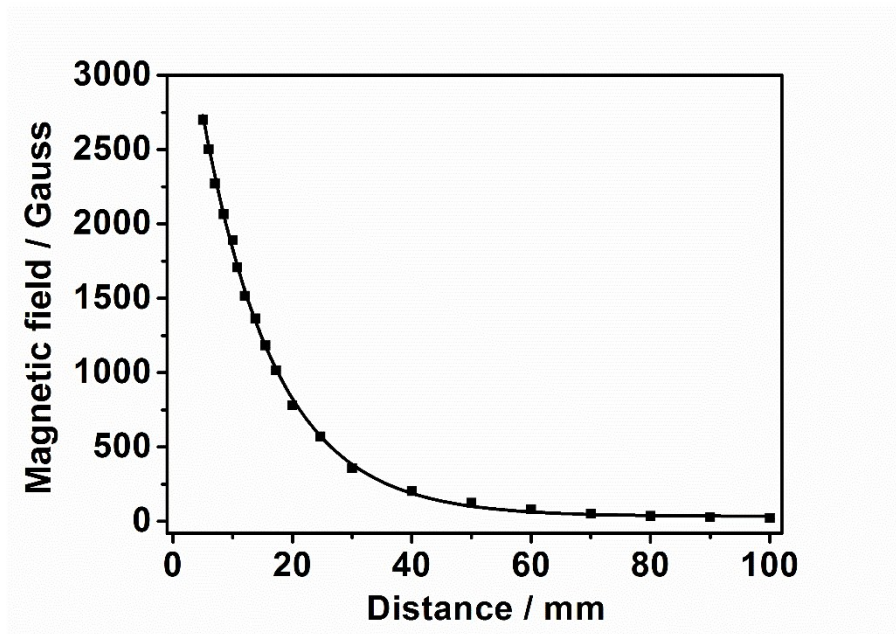

**Figure S2.** The strength of magnetic fields at different distance from the centre of the magnet used for measuring the reflectance spectra.

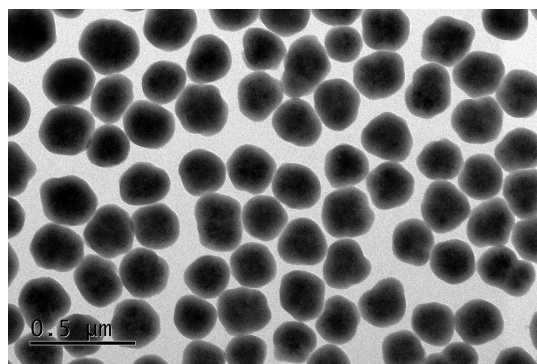

**Figure S3.** A typical TEM image of silica-coated  $\text{Fe}_3\text{O}_4$  CNCs ( $\text{Fe}_3\text{O}_4@\text{SiO}_2$ ).
